# Supplementary material
Source: Royal Society of Chemistry journal article supplement (doi:10.1039/d6lc00010j)
Supplement: d6lc00010j1.pdf [file d6lc00010j1.pdf]

## Supplementary material for "A Tunable 50 MHz Acoustic Vortex Tweezers for Size-Selective Manipulation and Cell Pre-concentration"

Xiongwei Wei<sup>†</sup>, Xin Wang<sup>†</sup>, Lili Miao, Yi Quan, Chunlong Fei<sup>\*</sup>, Yintang Yang

### Supplementary videos

Supplementary Video S1 : demonstrates the orbital revolution process of microspheres in an M=1 vortex field.

Supplementary Video S2 : demonstrates the orbital revolution process of microspheres in an M=3 vortex field.

Supplementary Video S3 : demonstrates the orbital revolution process of microspheres in an M=5 vortex field.

Supplementary Video S4 : demonstrates the process of yeast cell enrichment in an M=1 vortex field.

Supplementary Video S5 : demonstrates the process of yeast cell enrichment in an M=3 vortex field.

Supplementary Video S6 : demonstrates the process of yeast cell enrichment and directed transport in an M=5 vortex field.

---

*Faculty of Integrated Circuit, Xidian University, Xian 710126, China.*

\* Corresponding Author: E-mail address: clfei@xidian.edu.cn.

† These authors contributed equally to this work.
